# Supplementary material for: Space-efficient and exact de Bruijn graph representation based on a Bloom filter
Source: Springer Nature journal article supplement (doi:10.1186/1748-7188-8-22), 2013-01-01

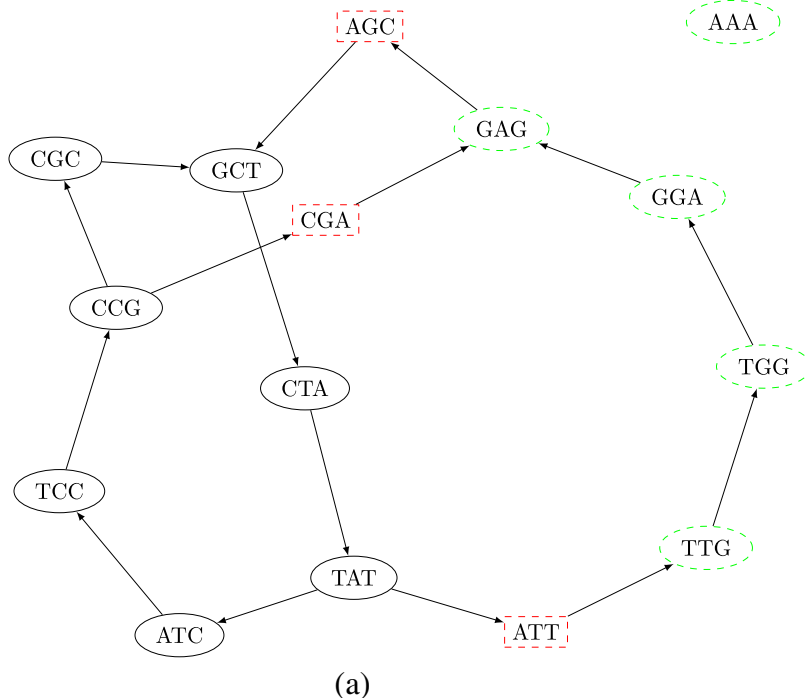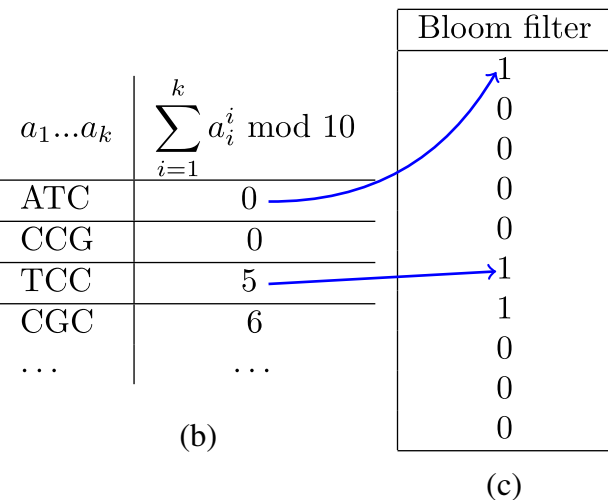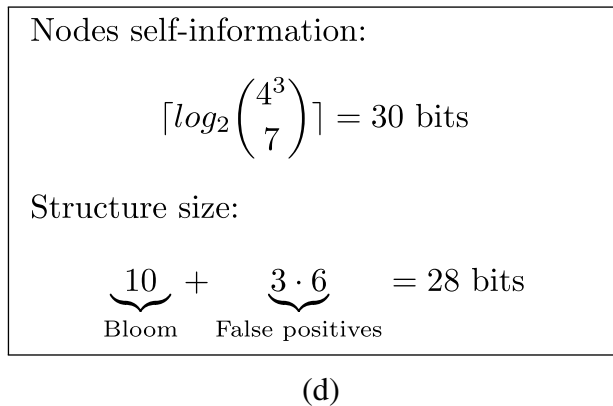

Supplement: 13015_2012_198_MOESM1_ESM.pdf [file 13015_2012_198_MOESM1_ESM.pdf]
